# Supplementary material
Source: publisher figshare collection journal article supplement (https://asha.figshare.com/articles/dataset/_/8233334)
Supplement: Supplementary file 1 [file 1]

**Supplemental Material S1.** Individual phonetic inventories<sup>a</sup> by month from birth to age 24 months for LCAS participants.

| LCAS Participant Subject Number |                                                                                         |                |             |                                  |          |                   |                         |
|---------------------------------|-----------------------------------------------------------------------------------------|----------------|-------------|----------------------------------|----------|-------------------|-------------------------|
| Month                           | #1                                                                                      | #2             | #5          | #8                               | #19      | #27               | #29                     |
| 1–6                             | (no consonants in the samples provided for any children in the study during months 1-6) |                |             |                                  |          |                   |                         |
| 7                               | 0 <sup>b</sup>                                                                          | 0              | 0           | — <sup>c</sup>                   | 0        | 0                 | 0                       |
| 8                               | <b>m</b>                                                                                | 0              | 0           | 0                                | —        | 0                 | 0                       |
| 9                               | 0                                                                                       | 0              | 0           | <b>d</b>                         | —        | 0                 | 0                       |
| 10                              | 0                                                                                       | <b>m</b>       | —           | 0                                | 0        | 0                 | 0                       |
| 11                              | 0                                                                                       | 0              | <b>n, h</b> | 0                                | 0        | —                 | 0                       |
| 12                              | <b>h</b>                                                                                | <b>m, d</b>    | —           | <b>d</b>                         | 0        | 0                 | —                       |
| 13                              | 0                                                                                       | 0              | <b>h</b>    | —                                | <b>m</b> | 0                 | 0                       |
| 14                              | <b>h</b>                                                                                | 0              | <b>d</b>    | 0                                | 0        | —                 | 0                       |
| 15                              | 0                                                                                       | <b>m, b</b>    | 0           | 0                                | 0        | 0                 | 0                       |
| 16                              | 0                                                                                       | —              | 0           | <b>d, h</b>                      | —        | 0                 | —                       |
| 17                              | <b>m, b</b>                                                                             | 0              | —           | 0                                | 0        | <b>b, w, d</b>    | —                       |
| 18                              | 0                                                                                       | —              | 0           | 0                                | <b>d</b> | 0                 | 0                       |
| 19                              | <b>m, b, n, h</b>                                                                       | —              | —           | —                                | 0        | <b>m, b, n, t</b> | <b>m, n</b>             |
| 20                              | <b>b, h</b>                                                                             | —              | 0           | <b>m, b, n, d, v</b>             | <b>d</b> | —                 | <b>m, b, n, d, h, t</b> |
| 21                              | <b>b</b>                                                                                | <b>m, b, p</b> | —           | —                                | 0        | —                 | <b>m, n</b>             |
| 22                              | <b>m, b</b>                                                                             | 0              | 0           | <b>m, d</b>                      | <b>b</b> | —                 | <b>n</b>                |
| 23                              | <b>b</b>                                                                                | 0              | <b>b</b>    | <b>m, b, n, w, d, p, h, k, g</b> | —        | —                 | 0                       |
| 24                              | <b>m, b</b>                                                                             | <b>b, d, h</b> | 0           | 0                                | <b>b</b> | <b>w, d</b>       | <b>m, n</b>             |

*Note.* LCAS = infants and toddlers later diagnosed with childhood apraxia of speech. <sup>a</sup>Number of different consonants produced in the sample (individual frequency of phones are not shown because each sample did not have the same amount of minutes of video—available from authors on request). <sup>b</sup>No consonants produced in the sample. <sup>c</sup>No data available for that month.
