# Supplementary material
Source: publisher figshare collection journal article supplement (https://asha.figshare.com/articles/dataset/_/8233334)
Supplement: Supplementary file 2 [file 1]

**Supplemental Material S3.** Individual phonetic inventories<sup>a</sup> by month from birth to age 24 months for TD participants.

| TD Participant Subject Number |                                                                                         |                                                    |                            |                                              |                         |
|-------------------------------|-----------------------------------------------------------------------------------------|----------------------------------------------------|----------------------------|----------------------------------------------|-------------------------|
| Month                         | #3                                                                                      | #9                                                 | #11                        | #13                                          | #24                     |
| 1–6                           | (no consonants in the samples provided for any children in the study during months 1–6) |                                                    |                            |                                              |                         |
| 7                             | <b>m, n</b>                                                                             | <b>m</b>                                           | 0 <sup>b</sup>             | <b>h</b>                                     | 0                       |
| 8                             | <b>m, h</b>                                                                             | 0                                                  | 0                          | <b>b, j</b>                                  | 0                       |
| 9                             | — <sup>c</sup>                                                                          | 0                                                  | <b>m, n</b>                | <b>m, b, n, w, d, k, g</b>                   | 0                       |
| 10                            | <b>m, b, n, d, g</b>                                                                    | —                                                  | <b>j, n, d</b>             | 0                                            | 0                       |
| 11                            | —                                                                                       | —                                                  | <b>m, d, t, k, g</b>       | 0                                            | 0                       |
| 12                            | —                                                                                       | <b>b, g</b>                                        | <b>d, t, g</b>             | <b>b, d</b>                                  | <b>b, w, d, v</b>       |
| 13                            | 0                                                                                       | <b>m, b, d</b>                                     | <b>m, j, d, h, t, k</b>    | 0                                            | 0                       |
| 14                            | —                                                                                       | <b>m, d</b>                                        | <b>g</b>                   | <b>m, j, d</b>                               | <b>b, d</b>             |
| 15                            | <b>b</b>                                                                                | <b>m, b, n, w, d</b>                               | <b>d, g</b>                | <b>j, n, d, g</b>                            | <b>d</b>                |
| 16                            | <b>d</b>                                                                                | <b>b, j, w</b>                                     | <b>m, n, g</b>             | —                                            | 0                       |
| 17                            | —                                                                                       | <b>b, n, w, d, p, h, t, k, g</b>                   | <b>m, b, j, d, h, l</b>    | <b>b, j, d, h, k, g, s</b>                   | <b>m, d</b>             |
| 18                            | —                                                                                       | —                                                  | <b>m, n, w, d, h, l</b>    | <b>b</b>                                     | <b>m, d</b>             |
| 19                            | —                                                                                       | <b>m, n, w, d, h, t, k, s</b>                      | <b>m</b>                   | <b>m, b, j, n, w, d, p, h, t, k, g, f, s</b> | <b>m, b, d, h</b>       |
| 20                            | —                                                                                       | —                                                  | <b>m, b, n, d</b>          | —                                            | 0                       |
| 21                            | —                                                                                       | <b>b, j, n, w, d, t, k, g, f, v, s, r</b>          | 0                          | —                                            | <b>m, b, n, d, p, k</b> |
| 22                            | —                                                                                       | —                                                  | <b>m, b, n, w, d, h, k</b> | —                                            | 0                       |
| 23                            | —                                                                                       | <b>m, b, j, n, w, d, p, h, t, a, k, g, f, s, r</b> | <b>m</b>                   | <b>b</b>                                     | <b>m, b, t, k, v, l</b> |
| 24                            | <b>m, b, j, n, w, d, p, h, t, k, g, ʈ, θ, s, z, r</b>                                   | <b>b, n, w, d, t, f, s, r</b>                      | <b>m, b, j, d, s, l</b>    | —                                            | —                       |

*Note.* TD = typically developing. <sup>a</sup>Number of different consonants produced in the sample (individual frequency of phones are not shown because each sample did not have the same amount of minutes of video—available from authors on request). <sup>b</sup>No consonants produced in the sample. <sup>c</sup>No data available for that month.
