# Supplementary material
Source: publisher figshare collection journal article supplement (https://asha.figshare.com/articles/dataset/_/8233334)
Supplement: Supplementary file 3 [file 1]

**Supplemental Material S2.** Individual phonetic inventories<sup>a</sup> by month from birth to age 24 months for LSSD participants.

| LSSD Participant Subject Number |                                                                                         |                               |                                           |                |                                                           |
|---------------------------------|-----------------------------------------------------------------------------------------|-------------------------------|-------------------------------------------|----------------|-----------------------------------------------------------|
| Month                           | #6                                                                                      | #7                            | #10                                       | #22            | #28                                                       |
| 1–6                             | (no consonants in the samples provided for any children in the study during months 1-6) |                               |                                           |                |                                                           |
| 7                               | 0 <sup>b</sup>                                                                          | 0                             | 0                                         | 0              | <b>m, b</b>                                               |
| 8                               | <b>h</b>                                                                                | 0                             | <b>m</b>                                  | — <sup>c</sup> | <b>m</b>                                                  |
| 9                               | <b>h</b>                                                                                | 0                             | 0                                         | 0              | <b>m</b>                                                  |
| 10                              | <b>b</b>                                                                                | <b>g</b>                      | <b>m</b>                                  | —              | 0                                                         |
| 11                              | <b>d, h, g</b>                                                                          | <b>b, k, g</b>                | <b>m, b, v</b>                            | 0              | 0                                                         |
| 12                              | <b>m, b, w, d, h, t</b>                                                                 | <b>b, j, w, d, p, h, k, g</b> | —                                         | —              | —                                                         |
| 13                              | <b>m, b, d, h</b>                                                                       | 0                             | 0                                         | <b>m</b>       | 0                                                         |
| 14                              | <b>j, d, h, k, g</b>                                                                    | <b>m, b, w</b>                | <b>0</b>                                  | —              | <b>d</b>                                                  |
| 15                              | <b>m</b>                                                                                | <b>d</b>                      | <b>d</b>                                  | —              | <b>m, d</b>                                               |
| 16                              | <b>b, j, w</b>                                                                          | <b>m, b, j, d, t, k, g, v</b> | —                                         | —              | 0                                                         |
| 17                              | <b>m, b, w, d, h</b>                                                                    | <b>m, j, n, g</b>             | —                                         | 0              | <b>m, b, j, n, p, h, g</b>                                |
| 18                              | <b>w</b>                                                                                | <b>b</b>                      | <b>m, p, h, k, f</b>                      | —              | <b>m, b, j, n, d, p, t, k, s</b>                          |
| 19                              | <b>b, h</b>                                                                             | <b>g</b>                      | <b>p</b>                                  | 0              | <b>m, b, j, n, d, p, h, t, k, s, l</b>                    |
| 20                              | <b>m, b, n, w, d, p, h, t, k, g</b>                                                     | <b>w, f</b>                   | —                                         | <b>b</b>       | <b>m, b, n, w, d, p, t, k, s</b>                          |
| 21                              | <b>m, b, j, n, w, d, p, h, t, k, g, s, r</b>                                            | <b>h</b>                      | 0                                         | —              | <b>m, b, w, d, p, h, t, g</b>                             |
| 22                              | <b>m, b, w, d, p, h, t, g</b>                                                           | <b>m, b, n, w, p</b>          | —                                         | 0              | 0                                                         |
| 23                              | <b>m, b, j, n, d, k</b>                                                                 | <b>b, w, d, k</b>             | <b>m, b, w, d</b>                         | —              | 0                                                         |
| 24                              | <b>m, b, j, n, w, d, h, t, k, g, f, j, s</b>                                            | <b>m, j, d, k, g, s</b>       | <b>m, b, j, w, d, p, h, t, k, g, f, r</b> | <b>m</b>       | <b>m, b, j, n, w, d, p, h, t, k, g, f, v, dʒ, s, z, l</b> |

*Note.* LSSD = infants and toddlers later diagnosed with speech sound disorder. <sup>a</sup>Number of different consonants produced in the sample (individual frequency of phones are not shown because each sample did not have the same amount of minutes of video—available from authors on request). <sup>b</sup>No consonants produced in the sample. <sup>c</sup>No data available for that month.
